# Supplementary material for: Women’s Usage Behavior and Perceived Usefulness with Using a Mobile Health Application for Gestational Diabetes Mellitus: Mixed-Methods Study
Source: MDPI journal article supplement (doi:10.3390/ijerph18126670), 2021-06-21
Supplement: s1 [file s1]

## Supplementary material 2: Interview guide

Understand you were using the Habits App, let us walk you through the app for recall before we proceed.

*a. Let us now talk about the educational lessons.*

Qn1: Can you explain to us the educational lesson/s you found the most useful? (preferably 2 most useful)

Qn2: Can you share with us examples how this lesson has helped to manage your GDM?

Qn3: Can you explain to us the educational lesson/s which were the least useful? (preferably 2 least useful)

Qn4: Can you share with us examples how this lesson was not helpful?

*b. Now regarding tracking your weight,*

Qn1: Did you use this app to track your weight? (If No, Qn2) (If Yes, Qn3,5)

Qn2: Can you explain the reasons?

Qn3: Did tracking your weight with this app helped to manage your weight? (If No, Qn4) (If Yes, Qn5)

Qn4: Can you give us examples how it has not helped to manage your weight?

Qn5: Can you give us examples how it has helped?

*c. I understand this App has a function where you can send messages to the coach,*

Qn1: Did you send messages to the coach?

Qn2: The coach sends automatic messages based on your glucose levels. How was the experience with this function?

Qn3: Can you give us examples how interacting with coach has helped to manage GDM?

Qn4: Can you give us examples how it has not helped?

*d. I understand this App has a function where you can enter diet data and get information on calorie and carbohydrate content,*

Qn1: How was the experience with this function?

Qn2: Can you give us examples how interacting with this diet tracking function has helped to manage GDM?

Qn3: Can you give us examples how it has not helped?

*Experiences with HCPs when using the app*

Qn1: Can you share with me your experiences with HCPs when using this app? (prompts- did they review tracking from the app)

Thank you for your participation. We have come to an end of our interview.
