# Supplementary material for: Women’s Usage Behavior and Perceived Usefulness with Using a Mobile Health Application for Gestational Diabetes Mellitus: Mixed-Methods Study
Source: MDPI journal article supplement (doi:10.3390/ijerph18126670), 2021-06-21
Supplement: s1 [file s1]

Supplementary Material Table S1: Demographic characteristics and health information of the participants

| Variable                                       |             | RCT<br>intervention<br>group<br>participants<br>(N = 170) | Interview<br>participants<br>(N = 14) |
|------------------------------------------------|-------------|-----------------------------------------------------------|---------------------------------------|
|                                                |             |                                                           |                                       |
| Age (years), range (average)                   |             | 24 – 43 (32)                                              | 27 – 36 (32)                          |
| <b>Ethnicity, n (%)</b>                        |             |                                                           |                                       |
|                                                | Chinese     | 75 (44)                                                   | 8 (57)                                |
|                                                | Non-Chinese | 95 (56)                                                   | 6 (43)                                |
| Gestation at diagnosis of GDM, weeks (SD)      |             | 25.5 (3.2)                                                | 24.9 (4.1)                            |
| Gestation at delivery, weeks <sup>a</sup> (SD) |             | 38.5 (1.9)                                                | 39.03 (1.1)                           |
| Family history of diabetes, n (%)              |             | 69 (42)                                                   | 1 (7)                                 |
| Insulin to manage GDM <sup>b</sup> , n (%)     |             | 17 (10)                                                   | 2 (14)                                |

<sup>a</sup>Value for Gestation at delivery was calculated for 168 individuals since data was not available for two participants who delivered outside Singapore.

<sup>b</sup>GDM: gestational diabetes mellitus.

Supplementary Material Table S2: Educational lessons usage (N=84)

| Lesson                                     | Participants who accessed any lesson at<br>least once, n (%) | Times each lesson was<br>accessed, n (%) |
|--------------------------------------------|--------------------------------------------------------------|------------------------------------------|
|                                            |                                                              |                                          |
| Total                                      | 84 (100)                                                     | 787 (100)                                |
| Glucose monitoring                         | 56 (67)                                                      | 127 (16)                                 |
| Healthy eating                             | 56 (67)                                                      | 78 (10)                                  |
| Introduction to Habits<br>GDM <sup>a</sup> | 49 (58)                                                      | 72 (9)                                   |
| Carbohydrates                              | 48 (57)                                                      | 67 (9)                                   |
| Weight gain                                | 47 (56)                                                      | 65 (8)                                   |
| Why treat                                  | 47 (56)                                                      | 61 (8)                                   |
| Eating smart                               | 42 (50)                                                      | 61 (8)                                   |
| Understanding GDM <sup>a</sup>             | 44 (52)                                                      | 56 (7)                                   |
| Managing stress                            | 43 (51)                                                      | 55 (7)                                   |
| Eating out                                 | 42 (50)                                                      | 52 (7)                                   |
| Looking ahead                              | 35 (42)                                                      | 47 (6)                                   |
| Why exercise                               | 38 (45)                                                      | 46 (6)                                   |

<sup>a</sup>GDM, gestational diabetes mellitus.
