# Supplementary material for: Women’s Usage Behavior and Perceived Usefulness with Using a Mobile Health Application for Gestational Diabetes Mellitus: Mixed-Methods Study
Source: Int J Environ Res Public Health. 2021 Jun 21;18(12):6670. doi: 10.3390/ijerph18126670 (PMC8296439; doi:10.3390/ijerph18126670)
Supplement: Supplementary file 1 [file ijerph-18-06670-s001.zip]

Archive with 4 entries (4 files):
- Figure S1 Screenshot of educational lessons of Habits-GDM application.jpg
- Figure S2 Tracking interfaces.jpg
- Supplementary material 2.pdf
- Supplementary Material 3 Tables.pdf
